# Supplementary material for: Single-LED solar simulator for amorphous Si and dye-sensitized solar cells
Source: Royal Society of Chemistry journal article supplement (doi:10.1039/c4ra01841a), 2014-01-01
Supplement: c4ra01841a1.pdf [file c4ra01841a1.pdf]

## Electronic Supplementary Information

# Single-LED solar simulator for amorphous Si and dye-sensitized solar cells

Tomohiko Nakajima,\* Kentaro Shinoda and Tetsuo Tsuchiya

Advanced Manufacturing Research Institute, National Institute of Advanced Industrial Science and Technology,  
Tsukuba Central 5, 1-1-1 Higashi, Tsukuba, Ibaraki 305-8565, Japan.

## Sample synthesis and characterization

Polycrystalline samples were prepared by a solid state reaction. Mixed powder of starting reagents in an appropriate molar ratio were ground, pressed into a pellet and heated. The detailed synthetic conditions are listed in Table S1. The phase analysis was carried out by X-ray diffraction (XRD) using a SmartLab (Rigaku). The surface morphology of polycrystalline samples was studied by a scanning electron microscope (SEM) using a JSM5400 (JEOL).

**Table S1** Synthesis conditions for polycrystalline samples.

| Material                                                                                                                       | Starting reagents <sup>a</sup>                                                                                                                                           | Temp. / °C | Time / h | Atmosphere           |
|--------------------------------------------------------------------------------------------------------------------------------|--------------------------------------------------------------------------------------------------------------------------------------------------------------------------|------------|----------|----------------------|
| CsVO <sub>3</sub>                                                                                                              | Cs <sub>2</sub> CO <sub>3</sub> (5mol% excess), V <sub>2</sub> O <sub>5</sub>                                                                                            | 430        | 24       | air                  |
| Zn <sub>3</sub> V <sub>2</sub> O <sub>8</sub>                                                                                  | ZnO, V <sub>2</sub> O <sub>5</sub>                                                                                                                                       | 750        | 24       | air                  |
| Ba <sub>2.91</sub> MgSi <sub>2</sub> O <sub>8</sub> :Eu <sub>0.04</sub> Mn <sub>0.05</sub>                                     | BaCO <sub>3</sub> , MgO, SiO <sub>2</sub> , Eu <sub>2</sub> O <sub>3</sub> , MnCO <sub>3</sub> , NH <sub>4</sub> Cl <sup>a</sup>                                         | 1300       | 3        | 1%H <sub>2</sub> /Ar |
| Ba <sub>1.83</sub> Sr <sub>0.5</sub> Ca <sub>0.5</sub> MgSi <sub>2</sub> O <sub>8</sub> :Eu <sub>0.02</sub> Mn <sub>0.15</sub> | BaCO <sub>3</sub> , SrCO <sub>3</sub> , CaCO <sub>3</sub> , MgO, SiO <sub>2</sub> , Eu <sub>2</sub> O <sub>3</sub> , MnCO <sub>3</sub> , NH <sub>4</sub> Cl <sup>a</sup> | 1300       | 3        | 1%H <sub>2</sub> /Ar |
| Sr <sub>2.83</sub> MgSi <sub>2</sub> O <sub>8</sub> :Eu <sub>0.02</sub> Mn <sub>0.15</sub>                                     | SrCO <sub>3</sub> , MgO, SiO <sub>2</sub> , Eu <sub>2</sub> O <sub>3</sub> , MnCO <sub>3</sub> , NH <sub>4</sub> Cl <sup>a</sup>                                         | 1300       | 3        | 1%H <sub>2</sub> /Ar |
| Ca <sub>2.83</sub> MgSi <sub>2</sub> O <sub>8</sub> :Eu <sub>0.02</sub> Mn <sub>0.15</sub>                                     | CaCO <sub>3</sub> , MgO, SiO <sub>2</sub> , Eu <sub>2</sub> O <sub>3</sub> , MnCO <sub>3</sub> , NH <sub>4</sub> Cl <sup>a</sup>                                         | 1300       | 3        | 1%H <sub>2</sub> /Ar |
| Ba <sub>0.985</sub> Mg <sub>1.8</sub> Si <sub>2</sub> O <sub>7</sub> :Eu <sub>0.015</sub> Mn <sub>0.2</sub>                    | BaCO <sub>3</sub> , MgO, SiO <sub>2</sub> , Eu <sub>2</sub> O <sub>3</sub> , MnCO <sub>3</sub> , NH <sub>4</sub> Cl <sup>a</sup>                                         | 1300       | 3        | 1%H <sub>2</sub> /Ar |
| Ba <sub>0.95</sub> Al <sub>2</sub> Si <sub>2</sub> O <sub>8</sub> :Eu <sub>0.05</sub>                                          | BaCO <sub>3</sub> , MgO, Al <sub>2</sub> O <sub>3</sub> , Eu <sub>2</sub> O <sub>3</sub> , NH <sub>4</sub> Cl <sup>a</sup>                                               | 1300       | 3        | 1%H <sub>2</sub> /Ar |
| Sr <sub>0.95</sub> Al <sub>2</sub> Si <sub>2</sub> O <sub>8</sub> :Eu <sub>0.05</sub>                                          | SrCO <sub>3</sub> , MgO, Al <sub>2</sub> O <sub>3</sub> , Eu <sub>2</sub> O <sub>3</sub> , NH <sub>4</sub> Cl <sup>a</sup>                                               | 1300       | 3        | 1%H <sub>2</sub> /Ar |
| LiGaO <sub>2</sub> :Fe <sub>0.01</sub>                                                                                         | Li <sub>2</sub> CO <sub>3</sub> , Ga <sub>2</sub> O <sub>3</sub> , Fe acetylacetonate                                                                                    | 1000       | 12       | air                  |

<sup>a</sup> 30 mol% NH<sub>4</sub>Cl was added as a flux

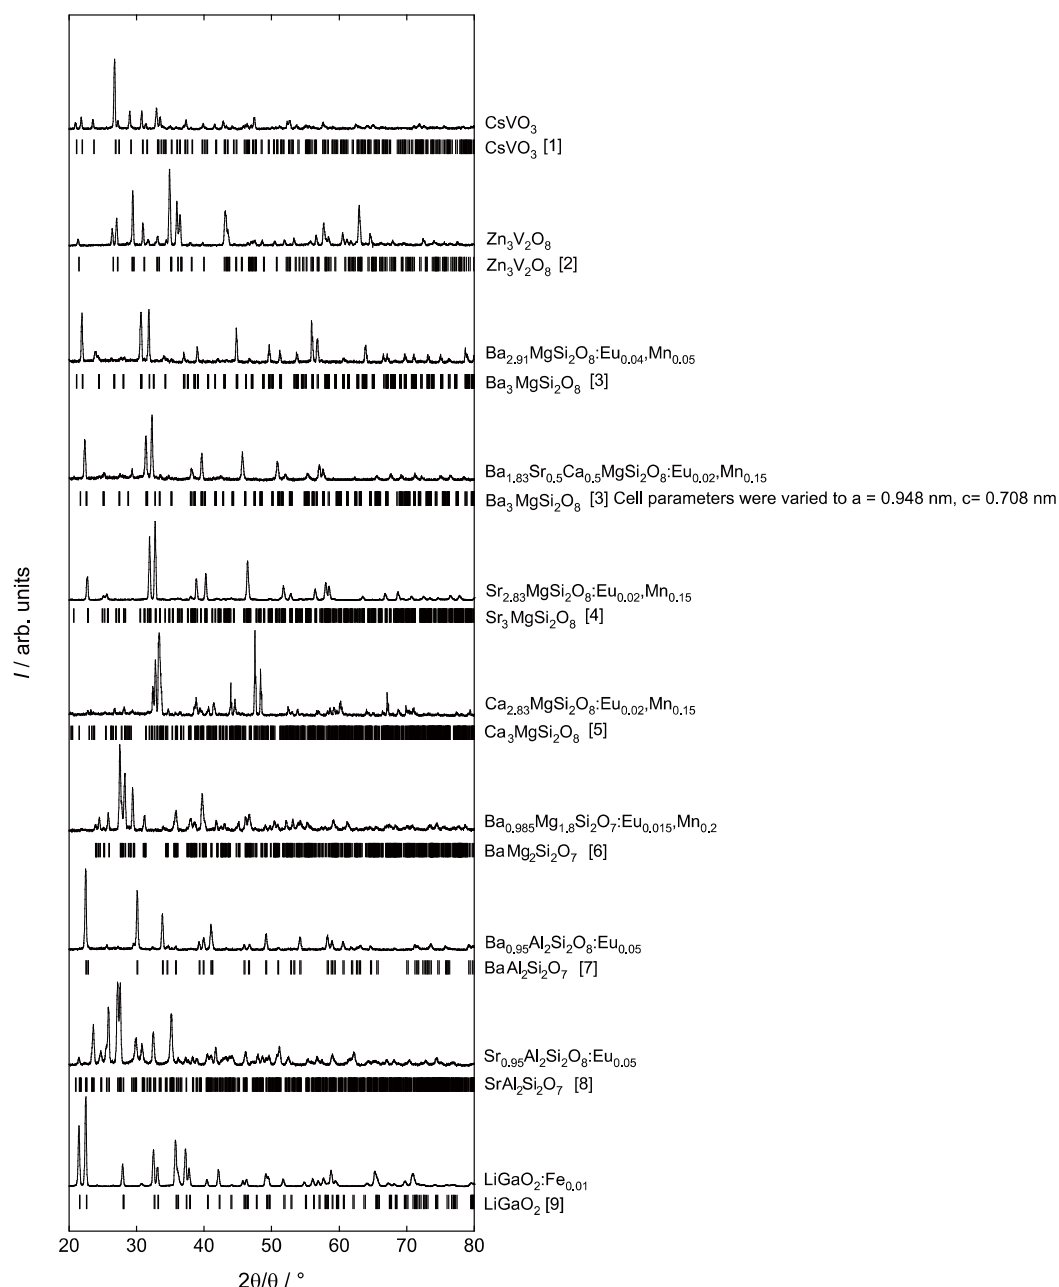

**Figure S1:** XRD patterns of obtained samples, and simulated peak positions (vertical marks) as references. The simulated peak positions were not refined for our samples.

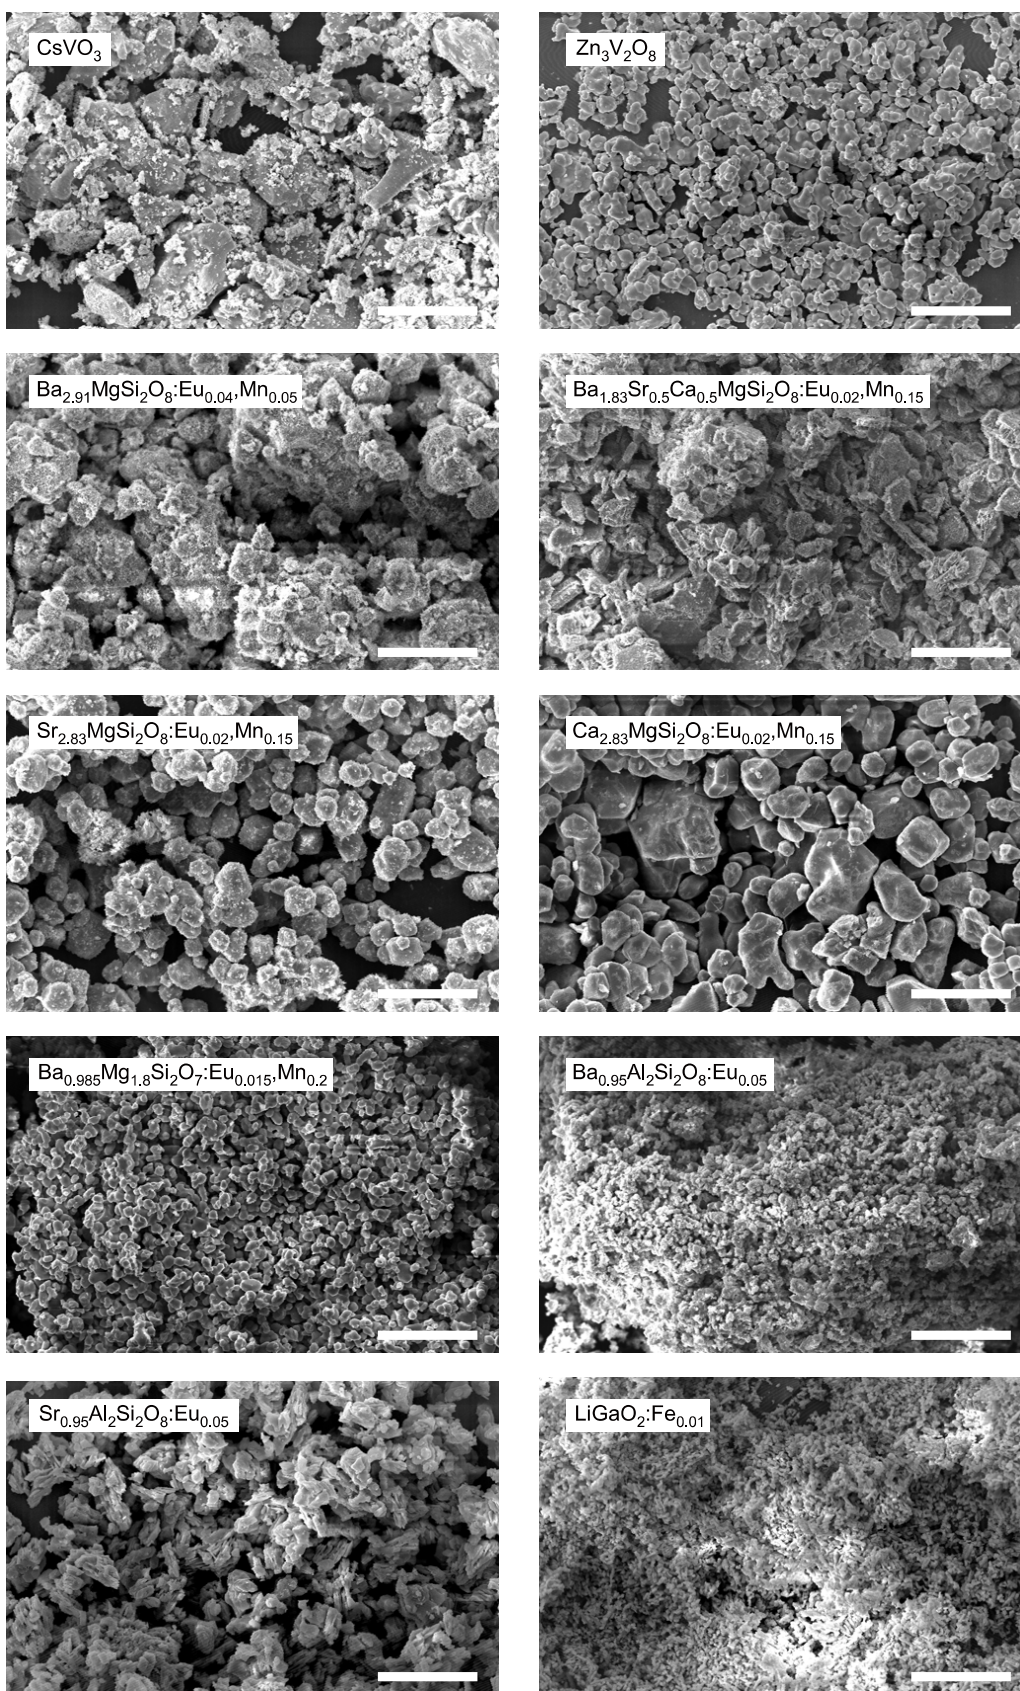

**Figure S2:** SEM images for the obtained samples. The scale bar indicates 50 µm.

## References

- 1 F. C. Hawthorne *et al.*, *J. Solid State Chem.*, 1977, **157**, 170.
- 2 R. Gopal *et al.*, *Can. J. Chem.*, 1971, **49**, 3056.
- 3 C-H. Park *et al.*, *J. Solid State Chem.*, 2009, **182**, 496.
- 4 Y. Yonesaki *et al.*, *J. Solid State Chem.*, 2009, **182**, 547.
- 5 P. B. Moore *et al.*, *Am. Mineralogist*, 1972, **57**, 1355.
- 6 C-H. Park *et al.*, *J. Solid State Chem.*, 2009, **182**, 1884.
- 7 Y. Takeuchi *et al.*, *J. Am. Ceram. Soc.*, 1951, **34**, 283.
- 8 G. Chiari *et al.*, *Am. Mineralogist*, 1975, **60**, 111.
- 9 G. M. Kuzmicheva *et al.*, *Inorg. Mater.*, 2001, **37**, 281.
